# Supplementary material for: A highly multiplexed droplet digital PCR assay to measure the intact HIV-1 proviral reservoir
Source: PubMed Central journal article supplement (PMC8080125; doi:10.1016/j.xcrm.2021.100243), 2021-04-12
Supplement: mmc1.pdf [file mmc1.pdf]

**Cell Reports Medicine, Volume 2**

**Supplemental information**

**A highly multiplexed droplet digital PCR assay  
to measure the intact HIV-1 proviral reservoir**

**Claire N. Levy, Sean M. Hughes, Pavitra Roychoudhury, Daniel B. Reeves, Chelsea Amstuz, Haiying Zhu, Meei-Li Huang, Yulun Wei, Marta E. Bull, Noah A.J. Cassidy, Jan McClure, Lisa M. Frenkel, Mars Stone, Sonia Bakkour, Elizabeth R. Wonderlich, Michael P. Busch, Steven G. Deeks, Joshua T. Schiffer, Robert W. Coombs, Dara A. Lehman, Keith R. Jerome, and Florian Hladik**

## Supplemental information

### Supplemental tables

| Multiplex assay | Primer/probe | Dye, Quencher | Sequence 5' to 3'                       | NC_001802 coordinates downloaded 27June19 |
|-----------------|--------------|---------------|-----------------------------------------|-------------------------------------------|
| assay1          | 3'pol F      |               | AGAGATCCACTTTGGAAAGGACCAGCAAA           | 4466-4494                                 |
|                 | 3'pol probe  | FAM, BHQ      | TGGAAAGGTGAAGG                          | 4502-4515                                 |
|                 | 3'pol R      |               | CACTACTTTTATGTCACTATTATCTTGTATTACTACTGC | 4517-4555                                 |
|                 | tat F        |               | TTTGTTTCATAACAAAAGGCTTAGGCATCTCC        | 5483-5514                                 |
|                 | tat probe    | FAM, BHQ      | ATGGCAGGAAGAAG                          | 5516-5529                                 |
|                 | tat R        |               | TGAGGAGCTCTTCGTCGCTGTCTCC               | 5531-5555                                 |
| assay2          | 5' pol F     |               | TCCTTTAGCTTCCCTCAGATCACTCT              | 1787-1812                                 |
|                 | 5' pol probe | FAM, BHQ      | TTGGCAACGACC                            | 1813-1824                                 |
|                 | 5' pol R     |               | TACTGTATCATCTGCTCCTGTATCTAATAGAGCTTC    | 1859-1894                                 |
|                 | gag F        |               | GACTAGCGGAGGCTAGAAGGAGAGA               | 310-334                                   |
|                 | gag probe    | HEX, BHQ      | ATGGGTGCGAGA                            | 336-347                                   |
|                 | gag R        |               | CTAATTCTCCCCGCTTAATAYTGACG              | 345-375                                   |
| assay1 & assay2 | env F        |               | TGTTCTTGGGTTCTGGGAGCAGCAGG              | 7323-7350                                 |
|                 | env probe    | HEX, BHQ      | AGCACTATGGG                             | 7352-7362                                 |
|                 | env R        |               | GCACTATACCAGACAATAATTGTCTGGCCTGTACC     | 7384-7418                                 |

**Table S1. HIV-1 multiplex primers and probes.** Related to Figures 1 and 2.

| Primer/<br>probe | Multiplex<br>assay | Dye,<br>Quencher | Sequence 5' to 3'            | GenBank Gene ID 6964 (TRD)<br>coordinates downloaded 27June19 |
|------------------|--------------------|------------------|------------------------------|---------------------------------------------------------------|
| deltaD F         | RPP30_deltaD       |                  | GCTGGCTGTAATGGGAATGT         | 18144-18163                                                   |
| deltaD<br>probe  |                    | FAM, BHQ         | TGTGAAGATGTCTGTAGCCATCTTAT   | 18171-18196                                                   |
| deltaD R         |                    |                  | TAATGGCTTGATAAAGATAAGTGATCAT | 18201-18228                                                   |

**Table S2. Primers and probes for the deltaD target in *TRD*.** Related to Figures 1 and 2.

| Primer/probe          | Multiplex assay | Dye, Quencher | Sequence 5' to 3'        | GenBank Gene ID 10556 ( <i>RPP30</i> ) coordinates downloaded 24June19 |
|-----------------------|-----------------|---------------|--------------------------|------------------------------------------------------------------------|
| 5' <i>RPP30</i> F     | RPP30_deltaD    |               | GCATATCAGGGTACAGCATAGG   | 16599-16620                                                            |
| 5' <i>RPP30</i> probe |                 | FAM, ZEN/IBFQ | TCTGCTCGTTGTTAGTCACCAGCT | 16635-16658                                                            |
| 5' <i>RPP30</i> R     |                 |               | CTTCCCTCACGGCATATACTTC   | 16678-16699                                                            |
| 3' <i>RPP30</i> F     |                 |               | GCTGTGTTTGCTCTCTTGATT    | 28266-28287                                                            |
| 3' <i>RPP30</i> probe |                 | HEX, ZEN/IBFQ | AATGTCTGTGACTGGGTTCTGGCT | 28322-28345                                                            |
| 3' <i>RPP30</i> R     |                 |               | GGTCTGTCCATGGCATCTTAT    | 28348-28368                                                            |

**Table S3. Primers and probes for the two targets in *RPP30*.** Related to Figures 1 and 2.

| Sample                       | Number of wells | Triple positive droplets |        | Triple positive detection rate |
|------------------------------|-----------------|--------------------------|--------|--------------------------------|
|                              |                 | assay1                   | assay2 |                                |
| Promega HIV- PBMC gDNA       | 90              | 0                        | 0      | 0/90                           |
| Lab extracted HIV- CD4+ gDNA | 29              | 1                        | 0      | 0/29                           |
| Lab extracted Jurkat gDNA    | 30              | 0                        | 0      | 0/30                           |

**Table S4. Specificity (true negative rate) test results.** Related to Figure 1.

| J-Lat8.4: 1E6 Jurkat | Number of wells | Triple positive droplets |        | Triple positive detection rate |
|----------------------|-----------------|--------------------------|--------|--------------------------------|
|                      |                 | assay1                   | assay2 |                                |
| 5000                 | 14              | 14                       | 14     | 14/14                          |
| 2500                 | 14              | 14                       | 14     | 14/14                          |
| 1000                 | 14              | 14                       | 14     | 14/14                          |
| 500                  | 14              | 14                       | 14     | 14/14                          |
| 100                  | 14              | 13                       | 14     | 13/14                          |
| 50                   | 13              | 13                       | 12     | 12/13                          |
| 5                    | 14              | 10                       | 4      | 4/14                           |
| 1                    | 14              | 5                        | 1      | 1/14                           |
| 0                    | 14              | 0                        | 0      | 0/14                           |

**Table S5. Limit of blank determination by dilution series.** ~245,000 cells were used in each test. Related to Figure 1.

| Cohort              | Participant ID    | Birth Year    | Birth Sex        | Location               | ART at sampling   | Time on ART   | Plasma Viral Load copies/mL                  | Genital Viral Load copies/mL | CD4 count     |
|---------------------|-------------------|---------------|------------------|------------------------|-------------------|---------------|----------------------------------------------|------------------------------|---------------|
| UW-CFAR_KINETICS    | 1020              | 1963          | M                | Seattle, WA, USA       | See Fig. S3       | 16 years      | See Fig. S4                                  | NA                           | See Fig. S5   |
|                     | 1028              | 1958          | M                |                        |                   |               |                                              |                              |               |
|                     | 1029              | 1961          | M                |                        |                   |               |                                              |                              |               |
|                     | 1031              | 1961          | M                |                        |                   |               |                                              |                              |               |
|                     | 1036              | 1961          | M                |                        |                   |               |                                              |                              |               |
|                     | 1068              | 1945          | M                |                        |                   |               |                                              |                              |               |
|                     | 1097              | 1967          | M                |                        |                   |               |                                              |                              |               |
|                     | 1186              | 1969          | M                |                        |                   |               |                                              |                              |               |
|                     | 1231              | 1958          | M                |                        |                   |               |                                              |                              |               |
|                     | 1268              | 1939          | M                |                        |                   |               |                                              |                              |               |
|                     | 1269              | 1961          | M                |                        |                   |               |                                              |                              |               |
|                     | 1308              | 1956          | F                |                        |                   |               |                                              |                              |               |
|                     | 1320              | 1955          | M                |                        |                   |               |                                              |                              |               |
|                     | 1332              | 1948          | M                |                        |                   |               |                                              |                              |               |
|                     | 1370              | 1960          | M                |                        |                   |               |                                              |                              |               |
|                     | 1377              | 1960          | M                |                        |                   |               |                                              |                              |               |
|                     | 1401              | 1969          | M                |                        |                   |               |                                              |                              |               |
|                     | 1444              | 1949          | M                |                        |                   |               |                                              |                              |               |
| 1819                | 1955              | M             |                  |                        |                   |               |                                              |                              |               |
| 1825                | 1957              | M             |                  |                        |                   |               |                                              |                              |               |
| Discordant Shedding | 28                | Not available | F                | Lima, Peru             | ddi/LPV / RTV     | 1 year        | 5292.00                                      | 171                          | Not available |
|                     | 90-2              |               | 3TC/NVP/d4T      |                        | 3 months          | 1000000.00    | 15,597                                       | Not available                |               |
|                     | 90-4              |               | EFV/3TC/d4T/NVP  |                        | 9 months          | 1570.00       | <30                                          | Not available                |               |
|                     | 93                |               | EFV/3TC/ZDV      |                        | 6 months          | 4250.00       | <30                                          | 694                          |               |
|                     | 97                |               | EFV/3TC/d4T      |                        | 6 months          | 69.00         | 130                                          | 154                          |               |
|                     | 101               |               | EFV/3TC/ZDV      |                        | 12 months         | 1694.00       | <30                                          | 74                           |               |
| ACTU-2100           | 8628              | 1958          | M                | Seattle, WA, USA       | EVG/COBI/FTC/TDF  | 19 years      | visit 1: <7; visit 2: <7                     | NA                           | 573           |
|                     | 9252              | 1963          | M                |                        | DTG/FTC/TAF       | 16 years      | visit 1: <7; visit 2: <7                     | NA                           | 492           |
|                     | 9282              | 1992          | M                |                        | DTG/RPV           | 5 years       | visit 1: Undetectable; visit 2: Undetectable | NA                           | 606           |
| UW-CFAR_QVOA        | AG                | Not available | Not available    | Seattle, WA, USA       | Not available     | Not available | <40                                          | NA                           | Not available |
|                     | BK                | 1968          | Not available    |                        | Not available     | Not available | 121                                          |                              | Not available |
|                     | BF                | 1978          | M                |                        | EVG/COBI/FTC/TAF  | 4.5 years     | <40                                          |                              | 247           |
|                     | BP                | 1964          | M                |                        | DTG, TDF/FTC      | 15.1 years    | <40                                          |                              | 638           |
|                     | BS                | Not available | M                |                        | EVG/COBI/FTC/TAF  | 5.7 years     | <40                                          |                              | 554           |
|                     | BT                | 1966          | M                |                        | Not available     | Not available | <40                                          |                              | 399           |
|                     | BU                | 1960          | M                |                        | Not available     | Not available | <40                                          |                              | 399           |
|                     | BW                | 1973          | M                |                        | RTV, DRV, TDF/FTC | 16.4 years    | <40                                          |                              | 616           |
|                     | BX                | 1972          | M                |                        | ATV, RTV, FTC/TDF | 8.0 years     | <40                                          |                              | 545           |
|                     | BY                | 1964          | M                |                        | ATV, FTC, TDF     | 20.2 years    | <40                                          |                              | 635           |
|                     | AA                | 1956          | M                |                        | ABC/DTG/3TC       | 20.4 years    | <40                                          |                              | 580           |
|                     | AB                | 1964          | M                |                        | Not available     | NA            | <40                                          |                              | 720           |
|                     | AC                | 1966          | M                |                        | Not available     | NA            | <40                                          |                              | 500           |
|                     | AF                | 1982          | M                |                        | EVG/COBI/FTC/TAF  | 3 years       | <40                                          |                              | 1283          |
| RAVEN               | 1602-R_2015-08-12 | Not available | M                | San Francisco, CA, USA | Not available     | 3.5 years     | 1.30                                         | NA                           | 626           |
|                     | 1602-R_2016-02-24 |               | Not available    |                        | 4.1 years         | 1.52          | 546                                          |                              |               |
|                     | 2078-R_2015-05-06 |               | Not available    |                        | 15.3 years        | 0.80          | 589                                          |                              |               |
|                     | 2168-R_2016-02-09 |               | Not available    |                        | 14.2 years        | 0.38          | 413                                          |                              |               |
|                     | 2168-R_2016-08-15 |               | Not available    |                        | 14.7 years        | 0.07          | 318                                          |                              |               |
|                     | 2274-R_2016-08-17 |               | NVP, TDF/FTC     |                        | 13.1 years        | 0.07          | 344                                          |                              |               |
|                     | 2274-R_2018-03-27 |               | Not available    |                        | Not available     | Not available | Not available                                |                              |               |
|                     | 2511-R_2016-06-01 |               | EFV/TDF/FTC, RAL |                        | 10.4 years        | 0.15          | 397                                          |                              |               |
|                     | 2609-R_2015-11-09 |               | Not available    |                        | 1.5 years         | 1.52          | 899                                          |                              |               |
|                     | 2672-R_2016-09-06 |               | Not available    |                        | 1.2 years         | 11.78         | 347                                          |                              |               |

**Table S6. Demographics of the UW-CFAR\_KINETICS, UW-CFAR\_QVOA, ACTU-2100, Discordant Shedding Cohort, and RAVEN participants.** 3TC, lamivudine; ABC, abacavir; ATV, atazanavir; COBI, cobicistat; d4T, stavudine, ddi, didanosine; DRV, darunavir; DTG, dolutegravir; EFV, efavirenz; EVG, elvitegravir; NVP, nevirapine; RAL, raltegravir; RTV, ritonavir; ZDV, zidovudine. Participant 90 provided samples from two visits, their ID is appended with the visit number. NA, not applicable. Related to Figures 4, 5 and 6.

## Supplemental Figures

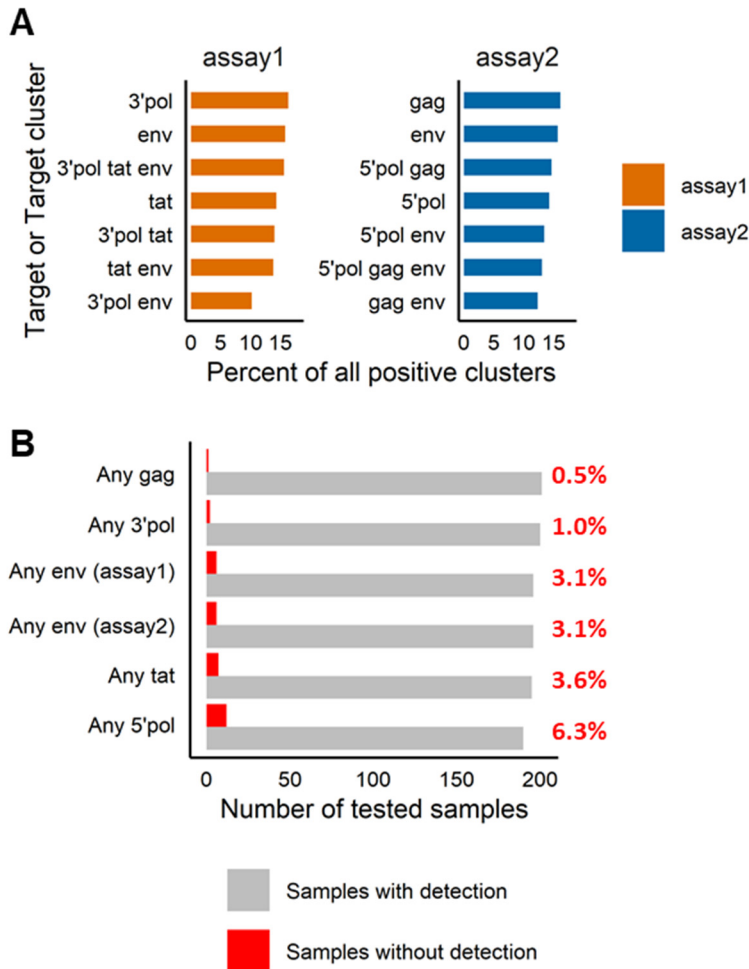

**Figure S1. Target detection frequencies. (A)** Detection frequencies of individual targets and target combinations in the two ddPCR assays. Percentages were calculated as  $100 \times$  events in specified cluster/events in all positive clusters. The *env* probe is the same sequence for both assays, so is measured twice for each sample.  $N = 201$  for assay1 and  $N = 200$  for assay2. Samples from  $CD4^+$  gDNA from the UW-CFAR\_KINETICS ( $n = 157$ ), RAVEN ( $n = 17$  for assay1,  $n = 16$  for assay2) and UW-CFAR\_QVOA ( $n = 27$ ) cohorts. Note that the true frequencies of all clusters are impacted by the level of DNA shearing. **(B)** Detection frequencies of each of the five targets in any combination. Values to the right of each bar indicate the percentage of samples in which the target was not detected ( $N = 202$ ; one sample was entirely negative and was included in the analysis in B but could not be included in A). Related to Figure 4.



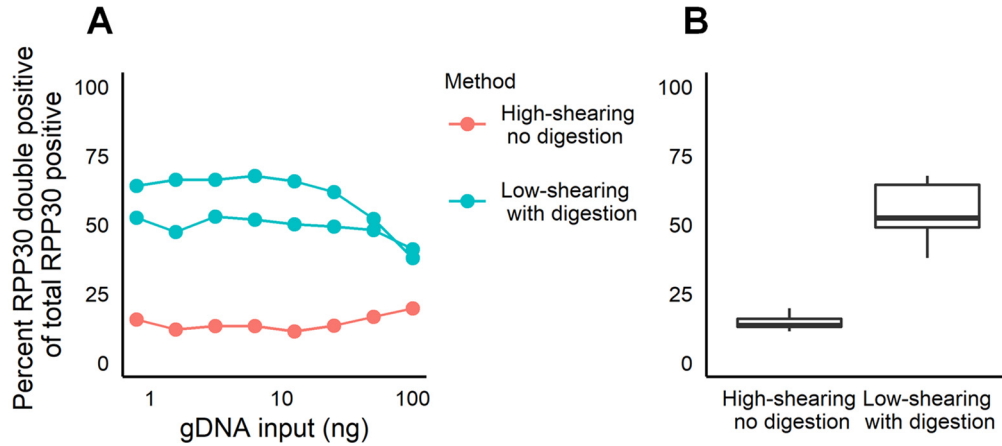

**Figure S2. Comparison of shearing resulting from two extraction methods.** We assayed two targets approximately 11kbp apart in the *RPP30* gene to assess shearing of the genomic DNA template. A higher percentage of *RPP30* double positive targets indicates less DNA shearing; more droplets contain DNA fragments containing both targets. **(A)** For clinical samples, a maximum of 10ng of gDNA is used per ddPCR replicate. For this demonstrative experiment, we used 8 different amounts of template from 1 to 100ng of gDNA template from ectocervical biopsies. If the gDNA input is increased to 100ng, the results from the two methods begin to converge because double positive droplets occur by chance due to the larger amount of DNA present. We extracted one replicate using the high-shearing method and two replicates with the low-shearing method. **(B)** A boxplot of showing the same data as in (A) but with the results of all 8 different amounts of DNA summarized in box and whisker plots. Related to Figure 3.

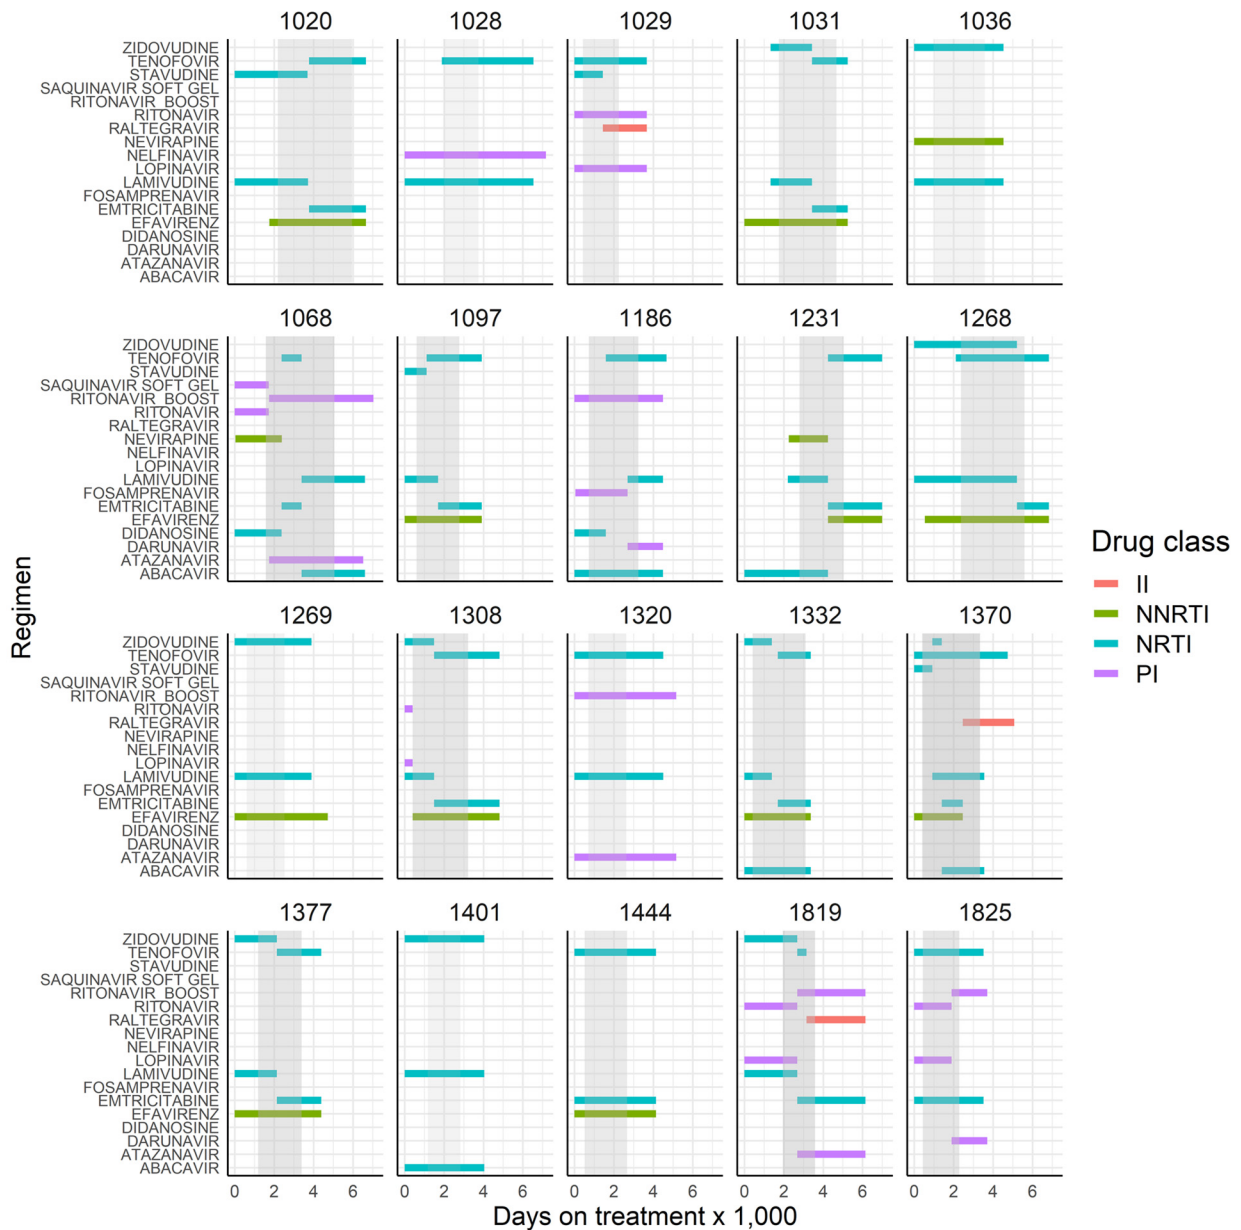

**Figure S3. ART regimens over time for the 20 UW-CFAR\_KINETICS cohort participants.** II: integrase inhibitor; NNRTI: non-nucleoside reverse transcriptase inhibitor, NRTI: nucleoside reverse transcriptase inhibitor; PI: protease inhibitor. Gray shaded time span is when samples used in the present study were collected. Related to Figure 5.

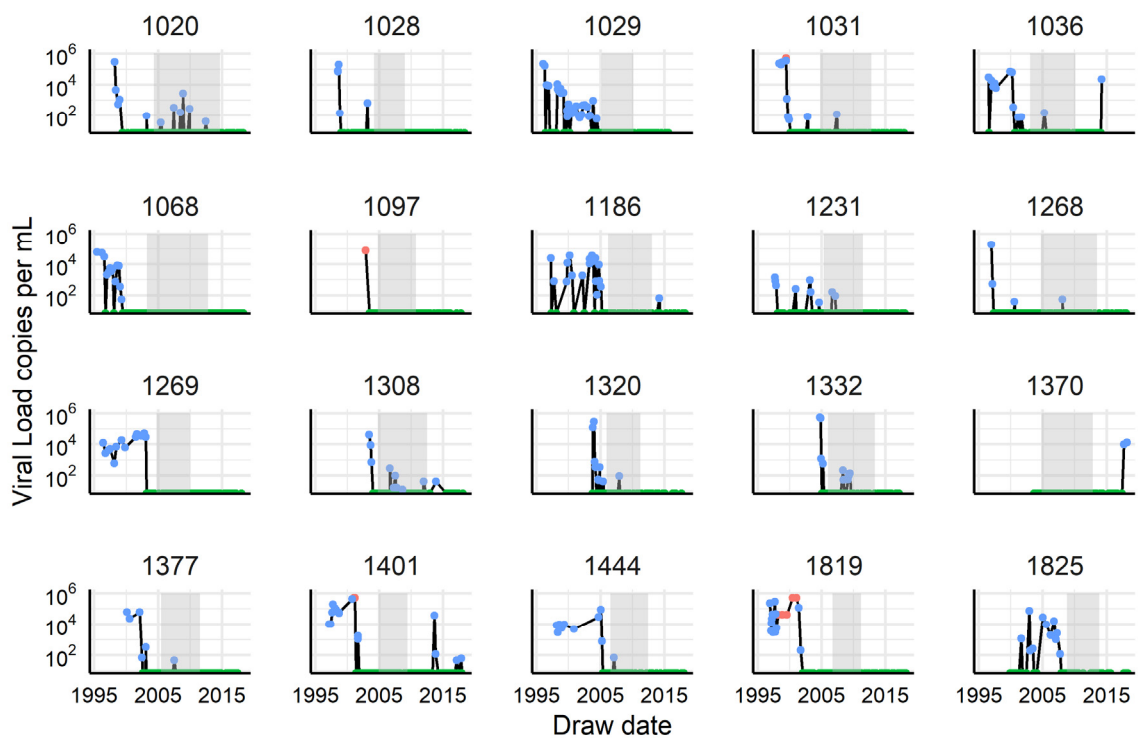

**Figure S4. Viral loads over time for the 20 UW-CFAR\_KINETICS cohort participants.** Blue: result in detectable range; red: result above limit of quantitation; green: result undetectable/below limit of quantitation. Gray shaded time span is when samples used in the present study were collected. Viral load assay methods changed over time; detectability is relative to the particular assay used and may not be identical from point to point. Related to Figure 5.

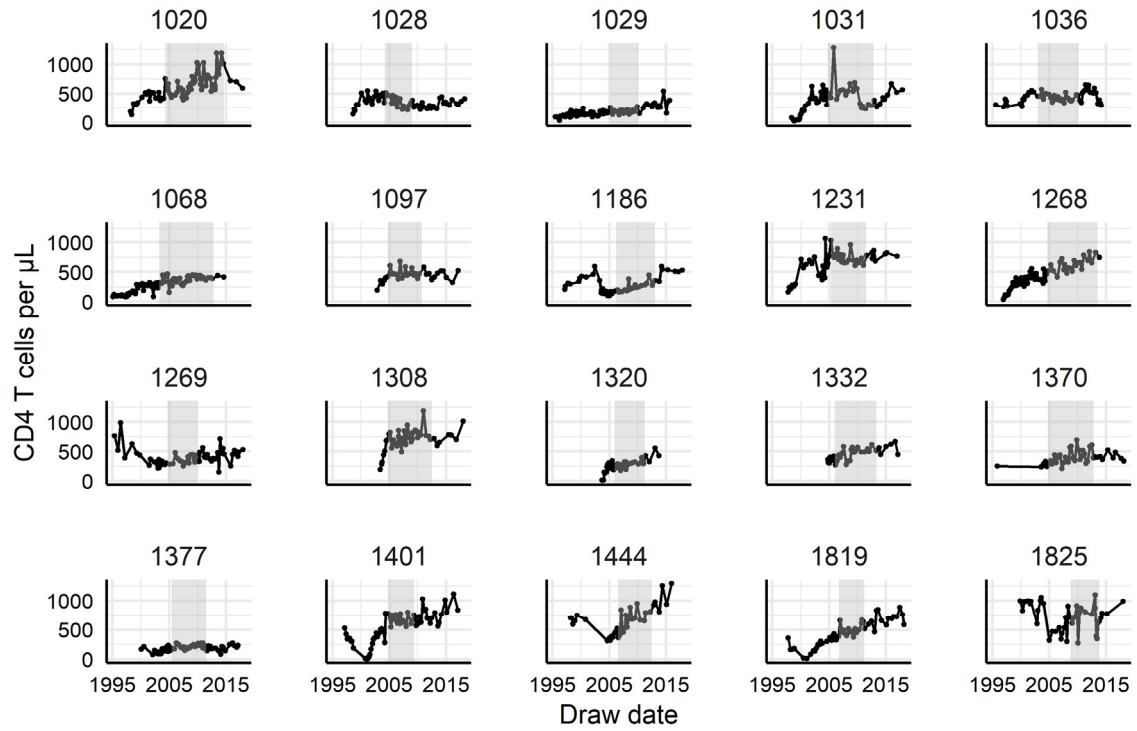

**Figure S5. CD4<sup>+</sup> T cell counts over time for the 20 UW-CFAR\_KINETICS cohort participants.** Gray shaded time span is when samples used in the present study were collected. Related to Figure 5.
